# Supplementary material for: A decade-long cruise time-series (2008–2018) of physical and biogeochemical conditions in the southern Salish Sea, North America
Source: Copernicus journal article supplement (doi:10.5194/essd-2023-239), 2023-09-28
Supplement: Supplementary file 1 [file essd-2023-239-supplement.pdf]

# Supplemental material for “A decade-long cruise time-series (2008–2018) of physical and biogeochemical conditions in the southern Salish Sea, North America”

5

Simone R. Alin<sup>1</sup>, Jan A. Newton<sup>2,3</sup>, Richard A. Feely<sup>1</sup>, Dana Greeley<sup>1</sup>, Beth Curry<sup>2,4</sup>, Julian Herndon<sup>5</sup>, and Mark Warner<sup>3</sup>

10 <sup>1</sup> Pacific Marine Environmental Laboratory, National Oceanic and Atmospheric Administration, 7600 Sand Point Way NE, Seattle, Washington 98115, USA

<sup>2</sup> Applied Physics Laboratory, University of Washington, Box 355640, Seattle, Washington 98105, USA

<sup>3</sup> School of Oceanography, University of Washington, 1492 NE Boat St., Seattle, Washington 98105, USA

<sup>4</sup> Currently at: MRV Systems, LLC, 6165 Greenwich Dr., San Diego, California 92122, USA

15 <sup>5</sup> Cooperative Institute for Climate, Ocean, and Ecosystem Studies, University of Washington, 3737 Brooklyn Ave NE, Seattle, Washington 98105, USA

## ORCID IDs

Alin: 0000-0002-8283-1910

Newton: 0000-0002-2551-1830

20 Feely: 0000-0003-3245-3568

Greeley: 0000-0003-4356-5899

Curry: 0000-0002-6534-4475

Herndon: 0009-0001-9820-9026

Warner: 0000-0001-7678-441X

25 *Correspondence to: Simone R. Alin ([simone.r.alin@noaa.gov](mailto:simone.r.alin@noaa.gov))*

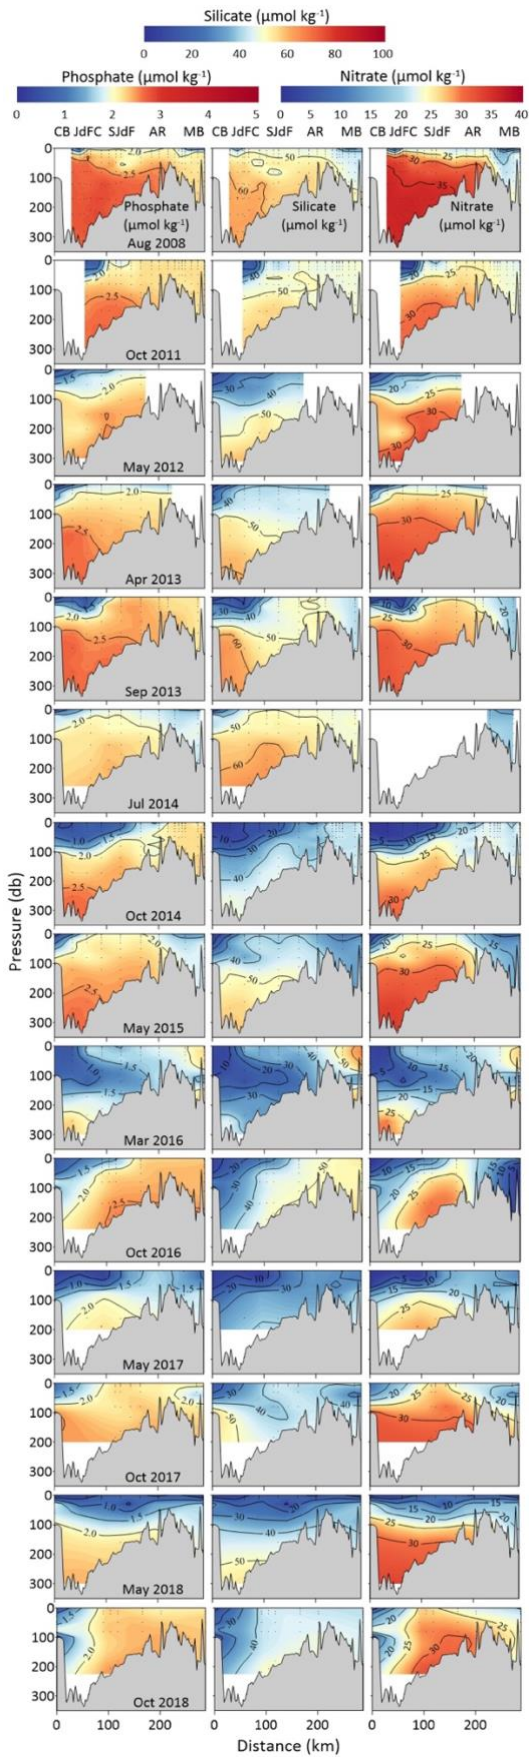

30 **Figure S1:** Depth transect plots from Sound-to-Sea cruises for phosphate, silicate, and nitrate content ( $\mu\text{mol kg}^{-1}$ ). Figure organization is the same as in Figure 3.

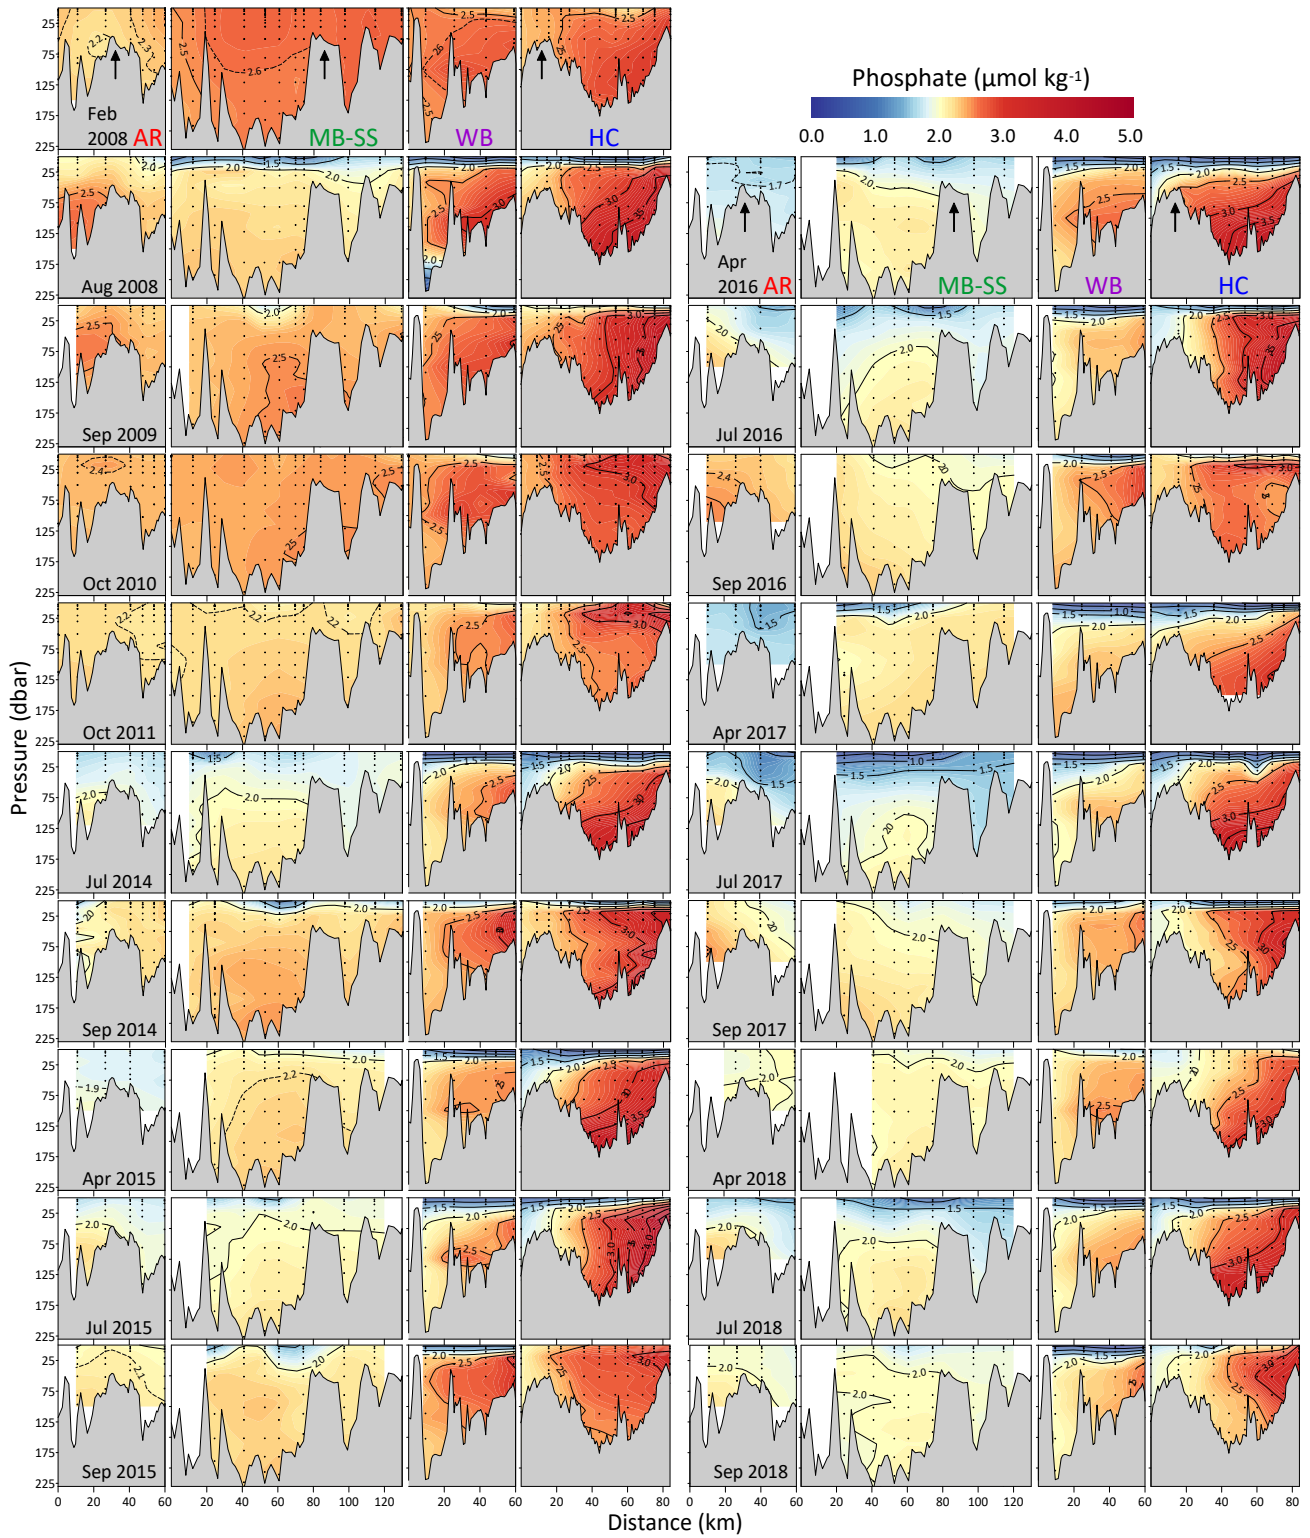

**Figure S2:** Depth transect plots from all Puget Sound cruises for phosphate content ( $\mu\text{mol kg}^{-1}$ ). Figure organization is the same as in Figure 3.

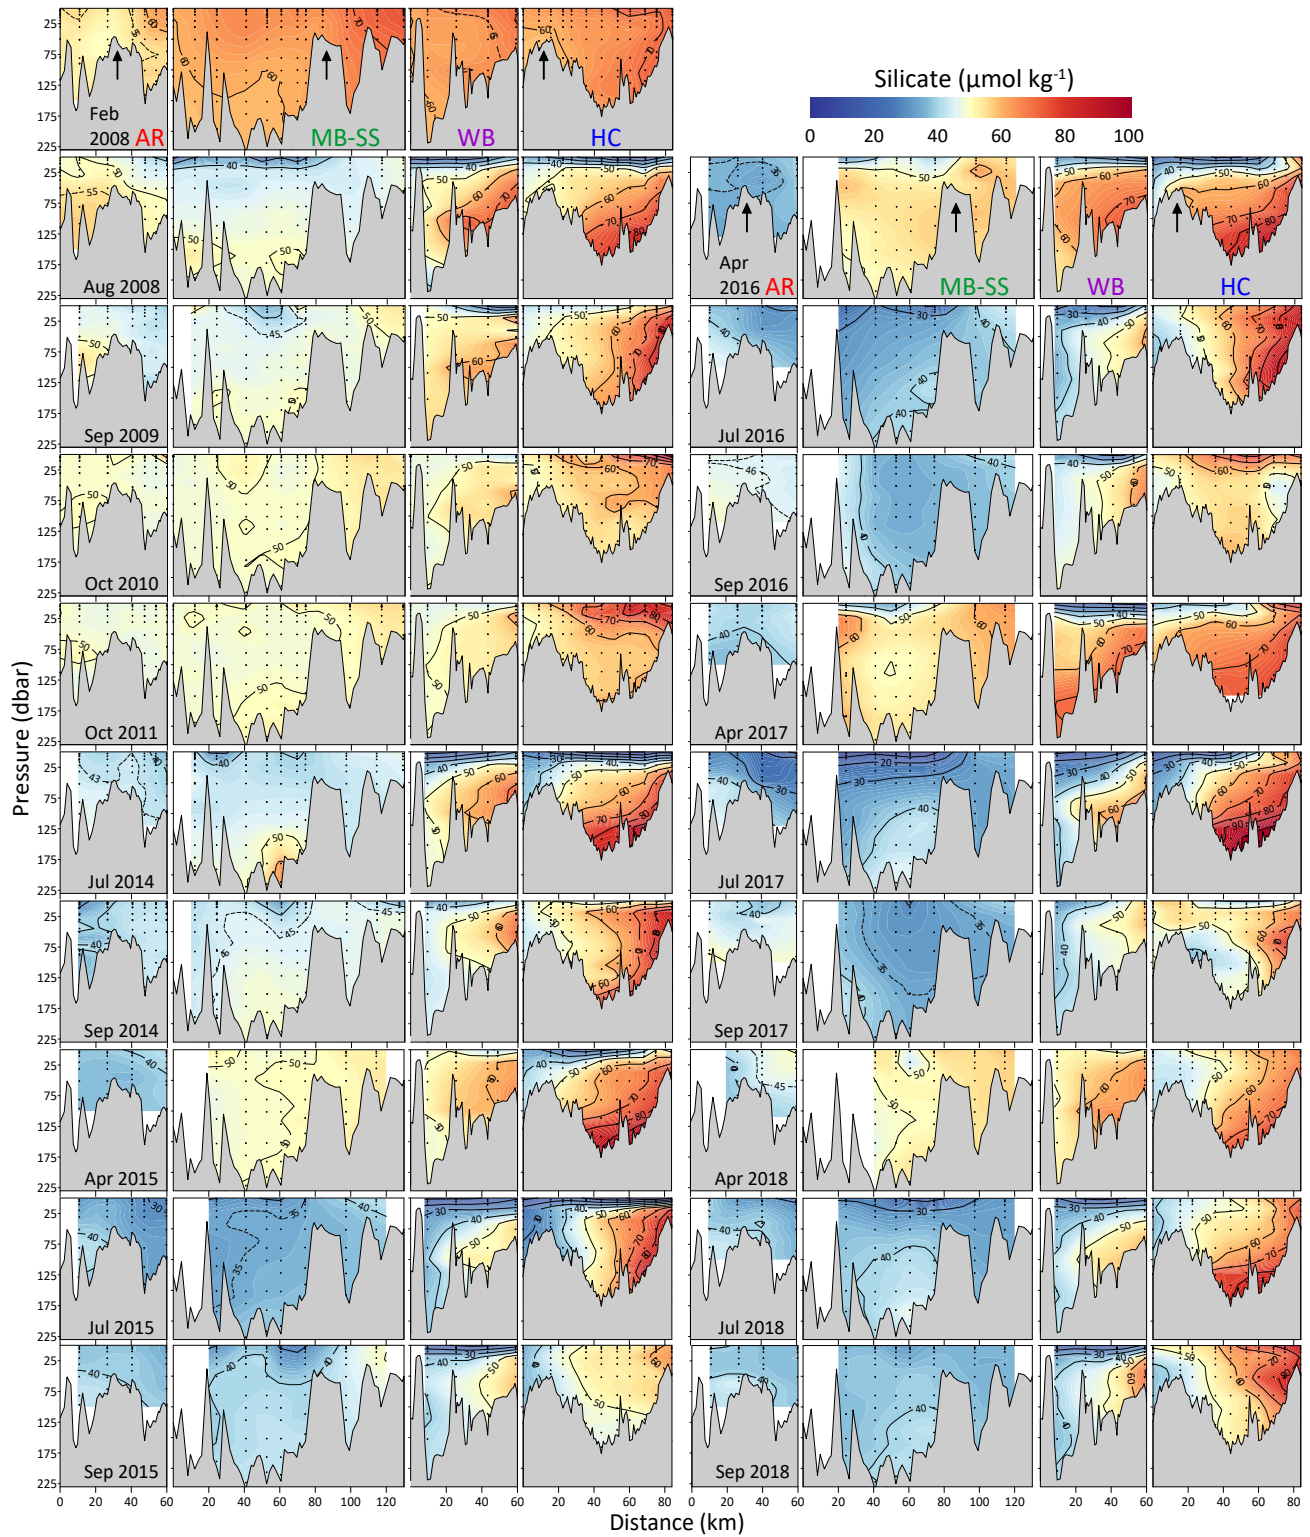

35

**Figure S3:** Depth transect plots from all Puget Sound cruises for silicate content ( $\mu\text{mol kg}^{-1}$ ). Figure organization is the same as in Figure 3.

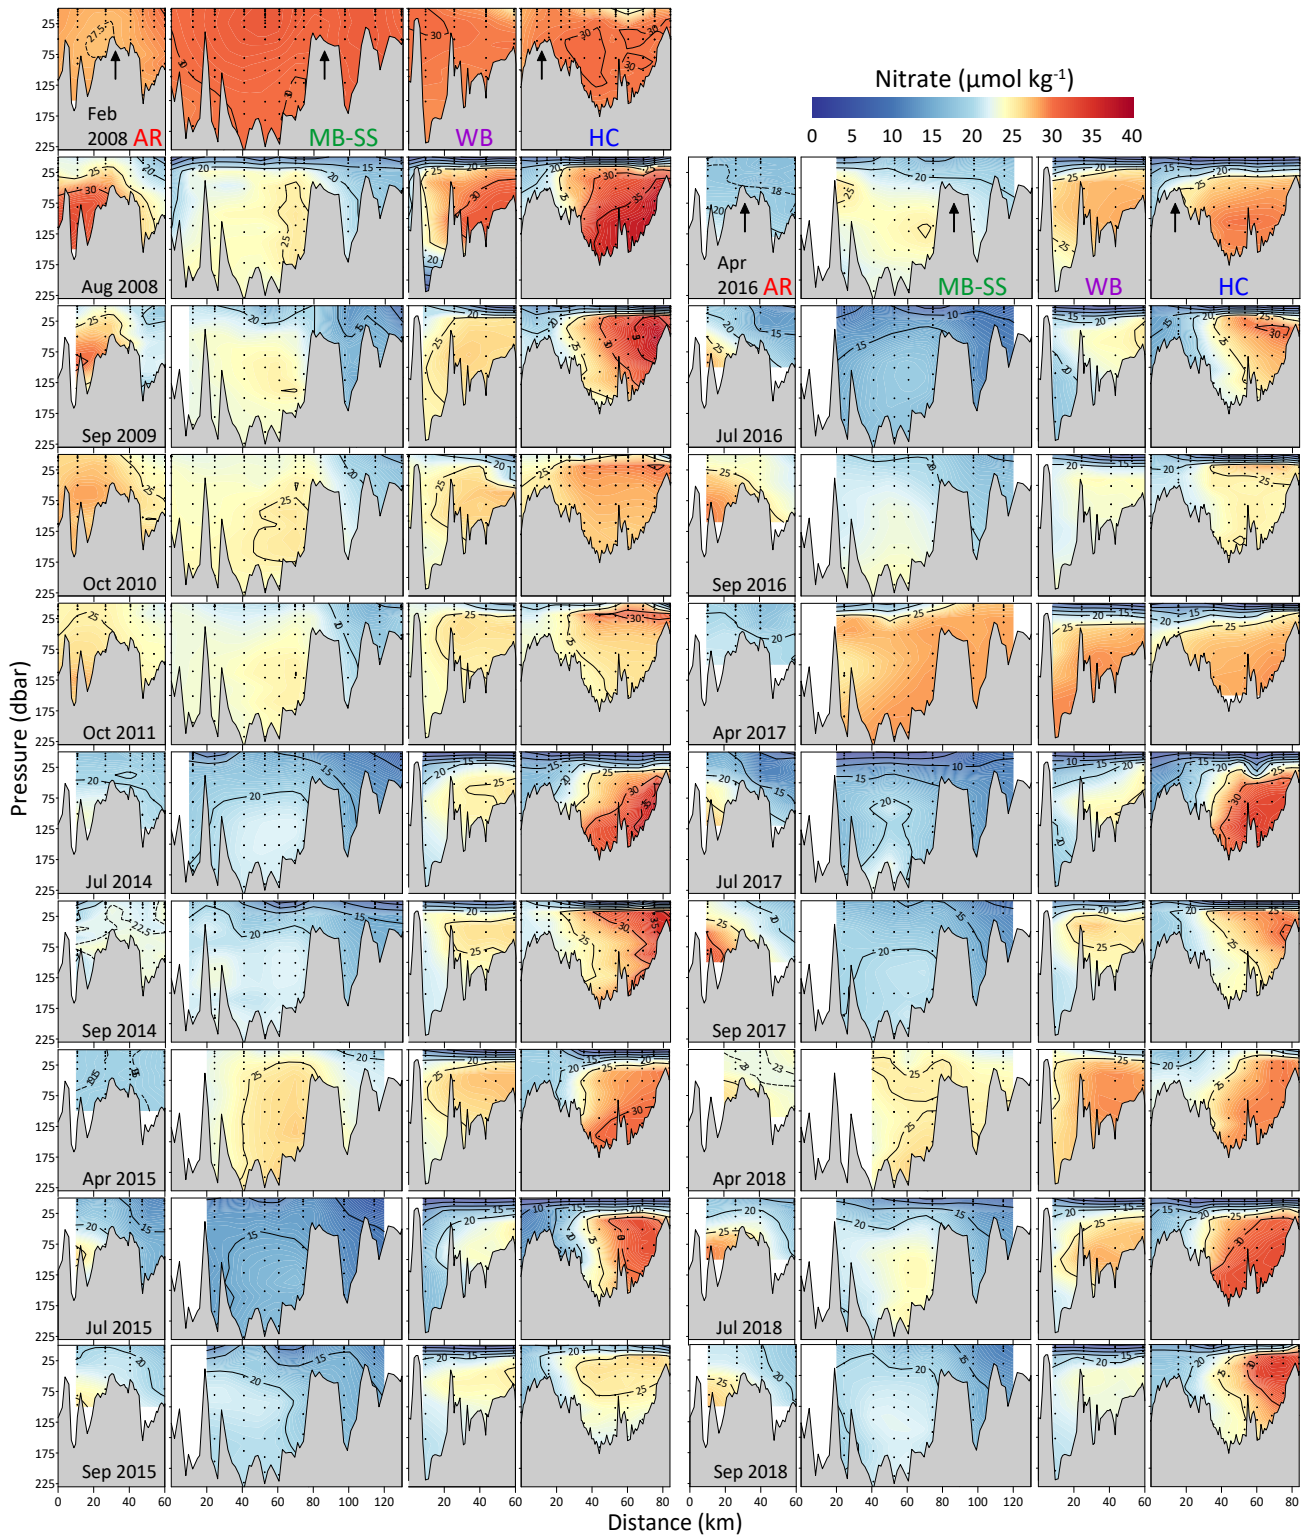

**Figure S4:** Depth transect plots from all Puget Sound cruises for nitrate content ( $\mu\text{mol kg}^{-1}$ ). Figure organization is the same as in Figure 3.
